# Supplementary material
Source: MDPI journal article supplement (https://www.mdpi.com/2073-4344/12/9/1010)
Supplement: s1 [file s1]

## Supporting Information

# Trimeric Ruthenium Cluster-Derived Ru Nanoparticles Dispersed in MIL-101(Cr) for Catalytic Transfer Hydrogenation

Kyung-Ryul Oh <sup>1</sup>, Sanil E. Sivan <sup>1</sup>, Changho Yoo <sup>1</sup>, Do-Young Hong <sup>1</sup> and Young Kyu Hwang <sup>1,2,\*</sup>

<sup>1</sup> Research Center for Nanocatalysts, Korea Research Institute of Chemical Technology, Daejeon 34114, Korea

<sup>2</sup> Department of Advanced Materials and Chemical Engineering, University of Science and Technology, Daejeon 34113, Korea

\* Correspondence: ykhwang@kRICT.re.kr; Tel.: +82-042-860-7680

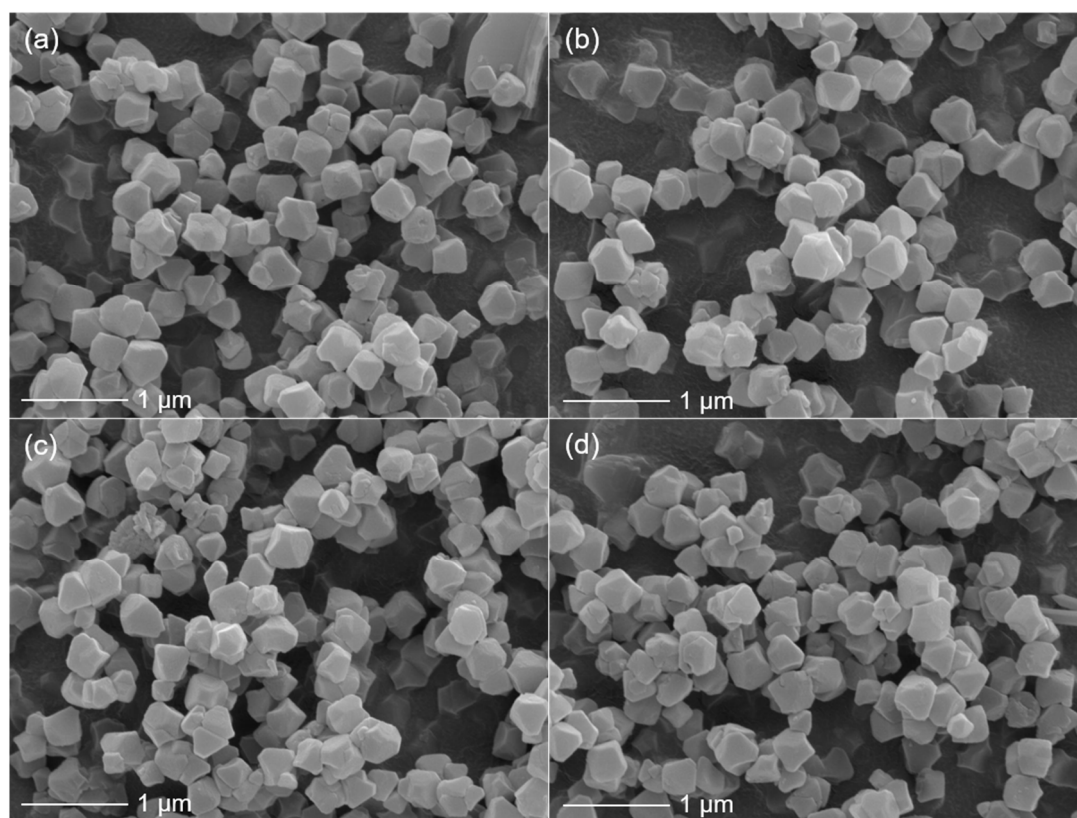

**Figure S1.** SEM images of (a) MIL-101(Cr), (b) ED-MIL-101(Cr), (c) Ru<sub>3</sub>-ED-MIL-101(Cr), and (d) Ru/ED-MIL-101(Cr).

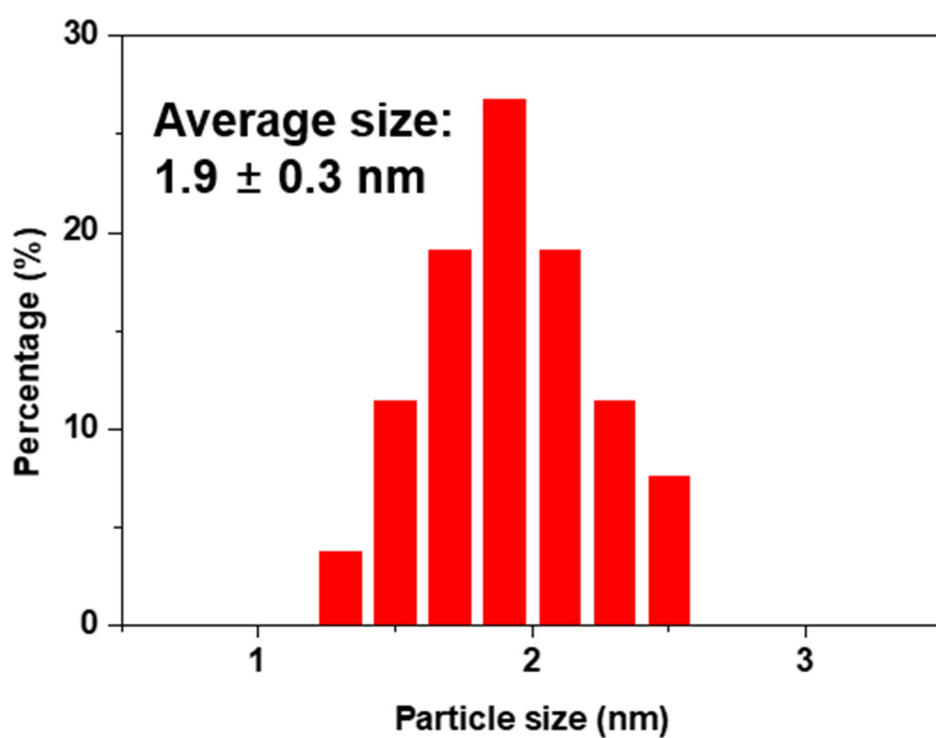

Figure S2. The particle size distribution of Ru nanoparticles in Ru/ED-MIL-101(Cr) observed by TEM.

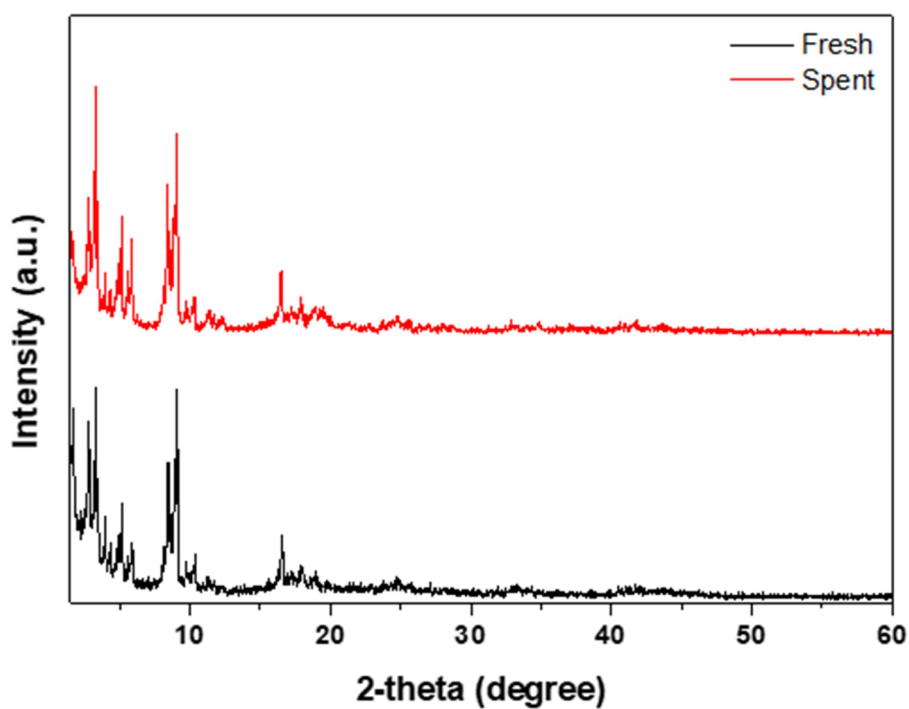

Figure S3. The PXRD patterns of Ru/ED-MIL-101(Cr) before (black) and after reaction (red).
